# Supplementary material for: Does preoperative multidisciplinary team assessment of high-risk patients improve the safety and outcomes of patients undergoing surgery?
Source: Springer Nature journal article supplement (doi:10.1186/s12871-023-02394-5), 2024-01-02
Supplement: MOESM1 [file 26582650]

## Supplementary

Table A Overview grading according Clavien Dindo

| <b>Grade</b> | <b>Definition</b>                                                                                                                                                                                                                                                                                                                                          |
|--------------|------------------------------------------------------------------------------------------------------------------------------------------------------------------------------------------------------------------------------------------------------------------------------------------------------------------------------------------------------------|
| Grade I      | Any deviation from the normal postoperative course without the need for pharmacological treatment or surgical, endoscopic, and radiological interventions<br>Allowed therapeutic regimens are: drugs as antiemetics, antipyretics, analgetics, diuretics, electrolytes, and physiotherapy. This grade also includes wound infections opened at the bedside |
| Grade II     | Requiring pharmacological treatment with drugs other than such allowed for grade I complications<br>Blood transfusions and total parenteral nutrition are also included                                                                                                                                                                                    |
| Grade III    | Requiring surgical, endoscopic or radiological intervention                                                                                                                                                                                                                                                                                                |
| IIIa         | Intervention not under general anesthesia                                                                                                                                                                                                                                                                                                                  |
| IIIb         | Intervention under general anesthesia                                                                                                                                                                                                                                                                                                                      |
| Grade IV     | Life-threatening complication (including CNS complications)* requiring IC/ICU management                                                                                                                                                                                                                                                                   |
| IVa          | Single organ dysfunction (including dialysis)                                                                                                                                                                                                                                                                                                              |
| IVb          | Multiorgan dysfunction                                                                                                                                                                                                                                                                                                                                     |
| Grade V      | Death of a patient                                                                                                                                                                                                                                                                                                                                         |

\*Brain hemorrhage, ischemic stroke, subarachnoid bleeding, but excluding transient ischemic attacks.  
CNS, central nervous system; IC, intermediate care; ICU, intensive care unit.

<https://doi.org/10.1371/journal.pone.0222570.t001>

Table B Preoperative consultation

|                                                        | <b>Positive<br/>advice MDT</b> | <b>Re-assessment</b> | <b>Negative<br/>advice MDT</b> | <b>p-value</b> |
|--------------------------------------------------------|--------------------------------|----------------------|--------------------------------|----------------|
| <b>Preoperative<br/>consultation<br/>cardiologist</b>  | 82                             | 42                   | 18                             | <i>0.006</i>   |
| <b>Preoperative<br/>consultation<br/>pulmonologist</b> | 39                             | 16                   | 6                              | <i>0.315</i>   |
| <b>Preoperative<br/>consultation<br/>geriatrician</b>  | 13                             | 5                    | 2                              | <i>0.763</i>   |

Table C. Reasoning first negative advice of the multidisciplinary team meeting

**Reasoning negative advice**

|                                                                           |        |
|---------------------------------------------------------------------------|--------|
| Too <del>many</del> <sup>uch</sup> morbidities or too frail               | n = 20 |
| Alternative surgery, less invasive                                        | n = 7  |
| <del>In</del> <sup>No</sup> -correct indication surgery                   | n = 5  |
| <del>Patient wish</del> <sup>Patient refused surgery not to operate</sup> | n = 3  |
| Pre-operative analysis <u>showed</u> new co-morbidity                     | n = 2  |
| Other treatment first                                                     | n = 1  |
| Missing data                                                              | n = 1  |

Table D. Input ACS NSQIP surgical risk calculator

|                              |                               | <b>Positive<br/>advice MDT</b> | <b>Re-<br/>assessment</b> | <b>Negative<br/>advice MDT</b> | <b>p-value</b> |
|------------------------------|-------------------------------|--------------------------------|---------------------------|--------------------------------|----------------|
| <b>Age group</b>             | Under 65<br>year              | 51 (33.1%)                     | 14 (25%)                  | 6 (15.4%)                      | <i>0.024</i>   |
|                              | 65-74 year                    | 53 (34.4%)                     | 15 (26.8%)                | 14 (35.9%)                     |                |
|                              | 75-84 year                    | 34 (22.1%)                     | 20 (35.7%)                | 18 (46.2%)                     |                |
|                              | 85 year and<br>older          | 16 (10.4%)                     | 7 (12.5%)                 | 1 (2.6%)                       |                |
| <b>Sex</b>                   | Female                        | 59 (38.3%)                     | 25 (44.6%)                | 13 (33.3%)                     | <i>0.520</i>   |
|                              | Male                          | 95 (61.7%)                     | 31 (55.4%)                | 26 (66.7%)                     |                |
| <b>Emergency<br/>case</b>    | Yes                           | 0                              | 0                         | 0                              |                |
|                              | No                            | 154                            | 56                        | 39                             |                |
| <b>Functional<br/>Status</b> | Independent                   | 101 (65.6%)                    | 26 (46.4%)                | 16 (41%)                       | <i>0.019</i>   |
|                              | Partially<br>dependent        | 41 (26.6%)                     | 25 (44.6%)                | 18 (46.2%)                     |                |
|                              | Total<br>dependent            | 12 (7.8%)                      | 5 (8.9%)                  | 5 (12.8)                       |                |
| <b>ASA</b>                   | Healthy<br>patient            | 0                              | 0                         | 0                              | <i>0.001</i>   |
|                              | Mild<br>systemic<br>disease   | 7                              | 0                         | 0                              |                |
|                              | Severe<br>systemic<br>disease | 93                             | 31                        | 11                             |                |
|                              | Constant<br>threat to life    | 54                             | 25                        | 28                             |                |
|                              | Moribund                      | 0                              | 0                         | 0                              |                |
|                              | Yes                           | 21 (13.6%)                     | 9 (16.1%)                 | 6 (15.4%)                      | <i>0.892</i>   |

|                                                             |                               |             |            |            |       |
|-------------------------------------------------------------|-------------------------------|-------------|------------|------------|-------|
| <b>Steroid use for chronic condition</b>                    | No                            | 133 (86.4%) | 47 (83.9%) | 33 (84.6%) |       |
| <b>Ascites within 30 days prior to surgery</b>              | Yes                           | 1 (0.6%)    | 1 (1.8%)   | 2 (5.1%)   | 0.138 |
|                                                             | No                            | 153 (99.4%) | 55 (98.2%) | 37 (94.9%) |       |
| <b>Systemic sepsis within 48 hours prior to surgery</b>     | None                          | 152 (98.7%) | 54 (96.4%) | 37 (94.9%) | 0.133 |
|                                                             | Sepsis                        | 0           | 0          | 0          |       |
|                                                             | SIRS                          | 1 (0.6%)    | 2 (3.6%)   | 2 (5.1%)   |       |
|                                                             | Septic shock                  | 0           | 0          | 0          |       |
| <b>Ventilator dependent</b>                                 | Yes                           | 4 (2.6%)    | 2 (3.6%)   | 1 (2.6%)   | 0.926 |
|                                                             | No                            | 150 (97.4%) | 54 (96.4%) | 38 (97.4%) |       |
| <b>Disseminated cancer</b>                                  | Yes                           | 16 (10.4%)  | 7 (12.5%)  | 4 (10.3%)  | 0.911 |
|                                                             | No                            | 136 (88.3)  | 49 (87.5%) | 35 (89.7%) |       |
| <b>Diabetes</b>                                             | No                            | 118 (76.6%) | 42 (75%)   | 23 (59%)   | 0.069 |
|                                                             | Yes                           | 35 (22.7%)  | 14 (25%)   | 16 (41%)   |       |
| <b>Hypertension requiring medication</b>                    | Yes                           | 117 (76.0%) | 48 (85.7%) | 30 (76.9%) | 0.339 |
|                                                             | No                            | 36 (23.4%)  | 8 (14.3%)  | 9 (23.1%)  |       |
| <b>Congestive heart failure in 30 days prior to surgery</b> | Yes                           | 60 (39%)    | 29 (51.8%) | 19 (48.7%) | 0.193 |
|                                                             | No                            | 94 (61%)    | 27 (48.2%) | 20 (51.3%) |       |
| <b>Dyspnea</b>                                              | No                            | 73 (47.4%)  | 16 (28.6%) | 6 (15.4%)  | 0.002 |
|                                                             | <b>With moderate exertion</b> | 61 (39.6%)  | 30 (53.6%) | 24 (61.5%) |       |
|                                                             | <b>At rest</b>                | 20 (13%)    | 10 (17.9%) | 9 (23.1%)  |       |
|                                                             | Yes                           | 31 (20.1%)  | 9 (16.1%)  | 7 (17.9%)  | 0.793 |

|                              |                |                 |                 |               |              |
|------------------------------|----------------|-----------------|-----------------|---------------|--------------|
| Current smoker within 1 year | <b>No</b>      | 121 (78.6%)     | 46 (82.1)       | 32 (82.1%)    |              |
|                              | <b>Missing</b> | 2               | 1               |               |              |
| History of Severe COPD       | <b>Yes</b>     | 21 (13.6%)      | 10 (17.9)       | 5 (12.8%)     | <i>0.715</i> |
| Dialysis                     | <b>No</b>      | 132 (85.7%)     | 46 (82.1)       | 34 (87.2%)    |              |
|                              | <b>Yes</b>     | 6 (3.9%)        | 2 (3.6%)        | 1 (2.6%)      | <i>0.922</i> |
| Acute Renal Failure          | <b>No</b>      | 147 (95.5%)     | 54 (96.4%)      | 38 (97.4%)    |              |
|                              | <b>Yes</b>     | 4 (2.6%)        | 2 (3.6%)        | 0             | <i>0.291</i> |
| BMI                          | <b>No</b>      | 149 (69.8%)     | 54 (96.4%)      | 39            |              |
|                              |                | 26.8 (SD 6.4)   | 26.2 (SD 6.6)   | 26.1 (SD 7.2) | <i>0.374</i> |
|                              | <b>High</b>    | 169.8 (SD 15.4) | 171.9 (SD 10.9) | 171 (SD 8.6)  | <i>0.008</i> |
|                              | <b>Weight</b>  | 80 (SD 22.1)    | 78.8 (SD 22.1)  | 77 (SD 25.2)  | <i>0.133</i> |
